# Supplementary material
Source: ML conference proceedings conference paper supplement (https://www.ecva.net/papers/eccv_2020/papers_ECCV/html/123640001_ECCV_2020_paper.php)

# High-resolution Inpainting Results (short side = 1024; zoom-in to see the details)

## Synthetic Samples

Input with holes

Ours

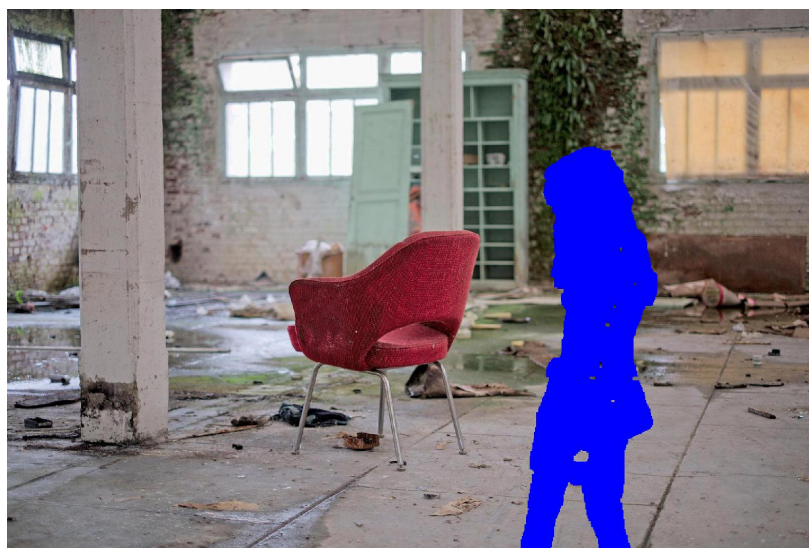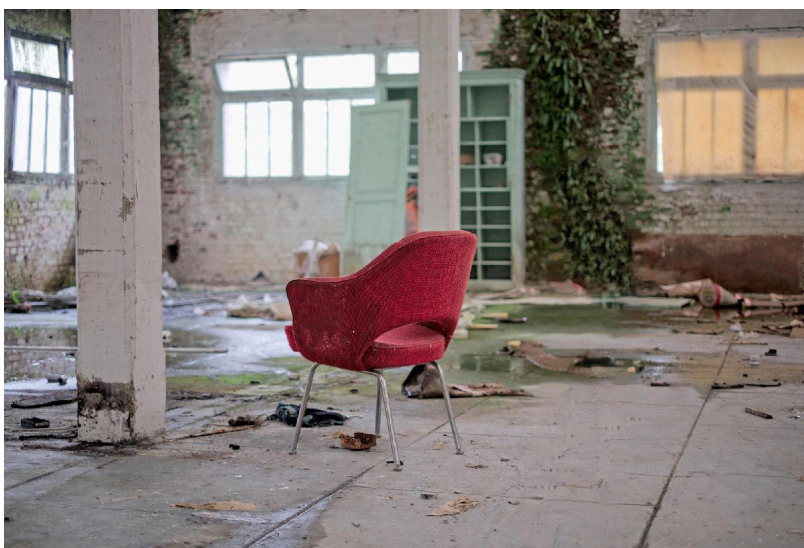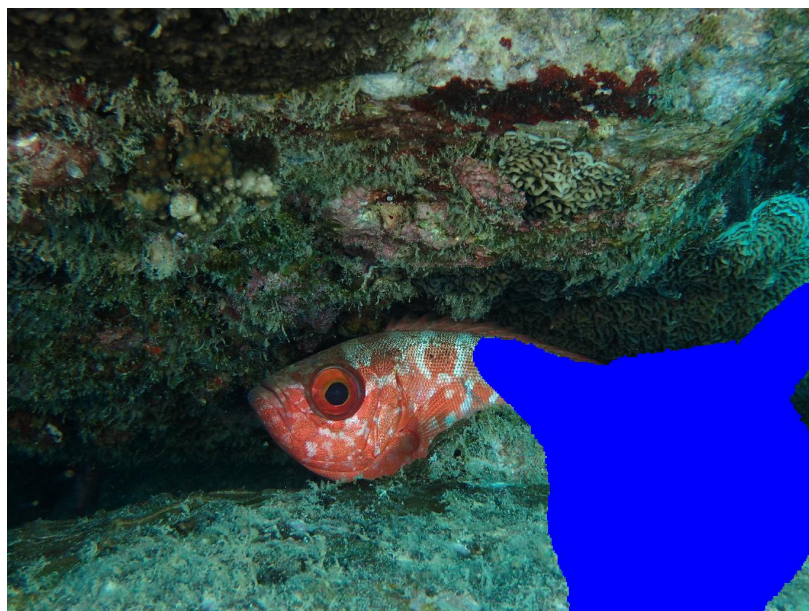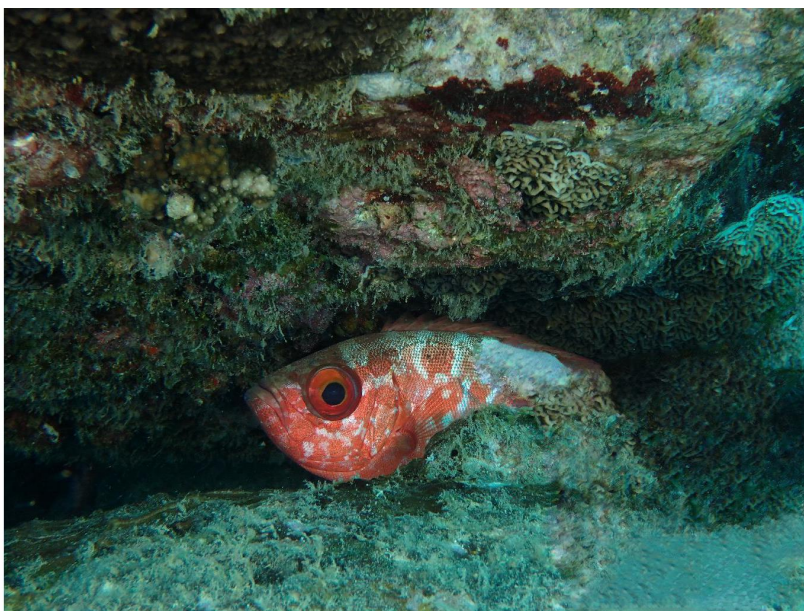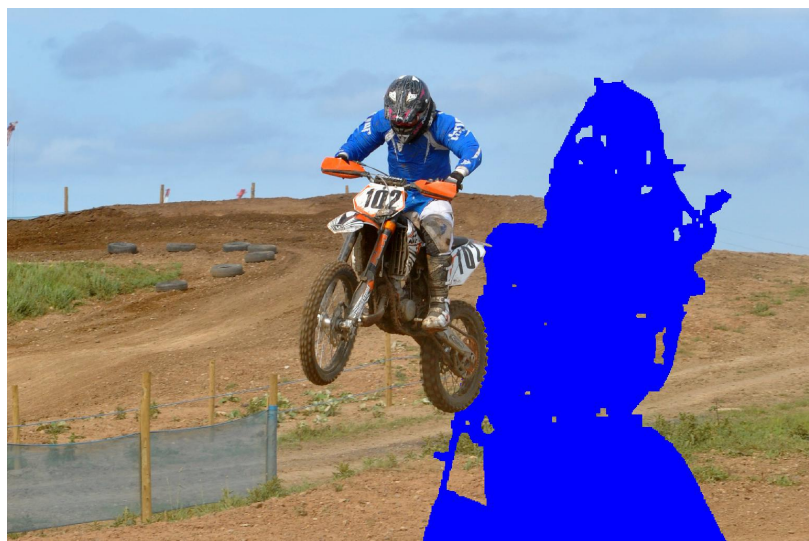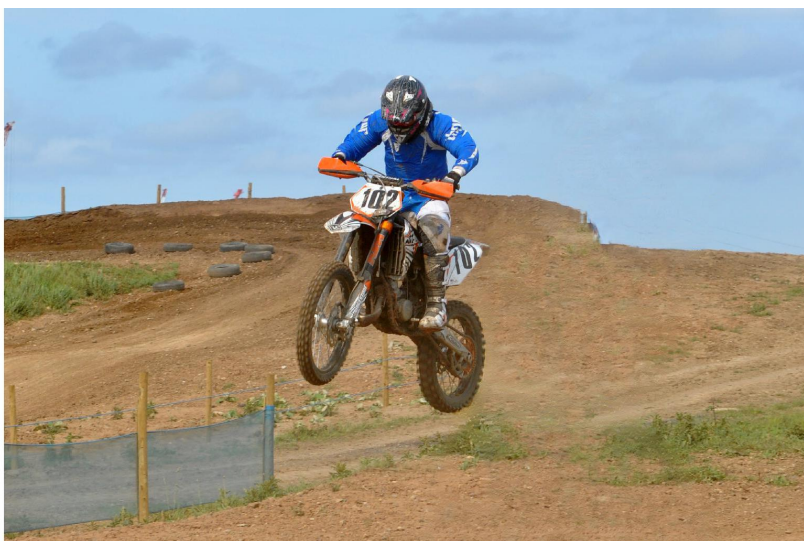



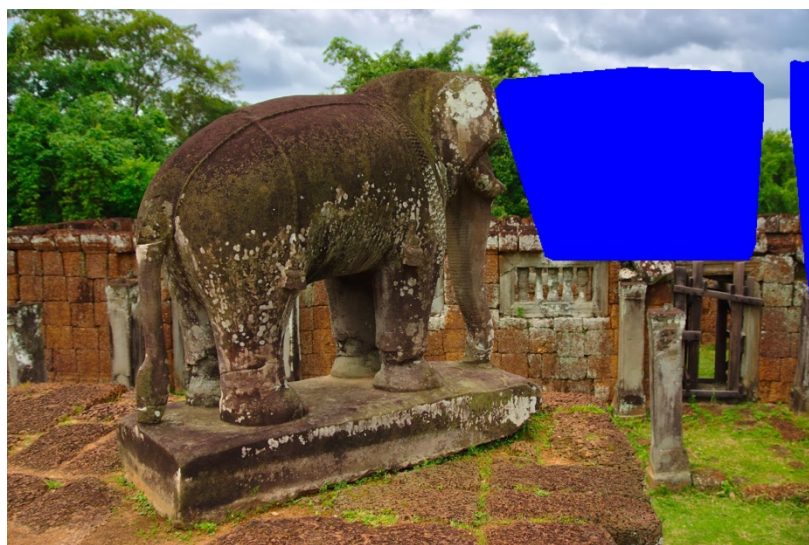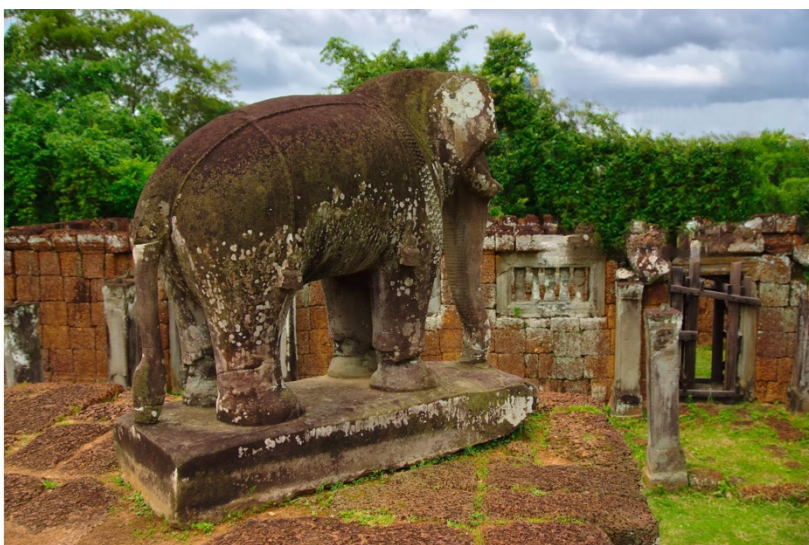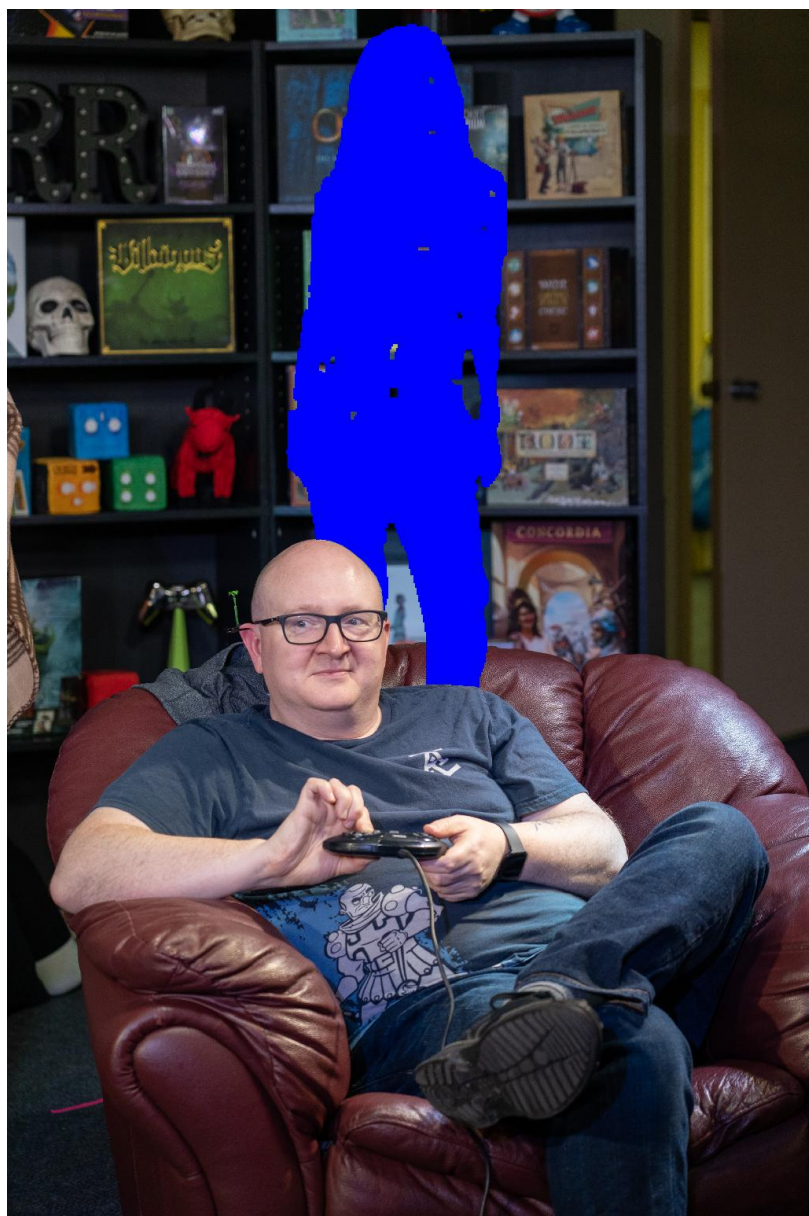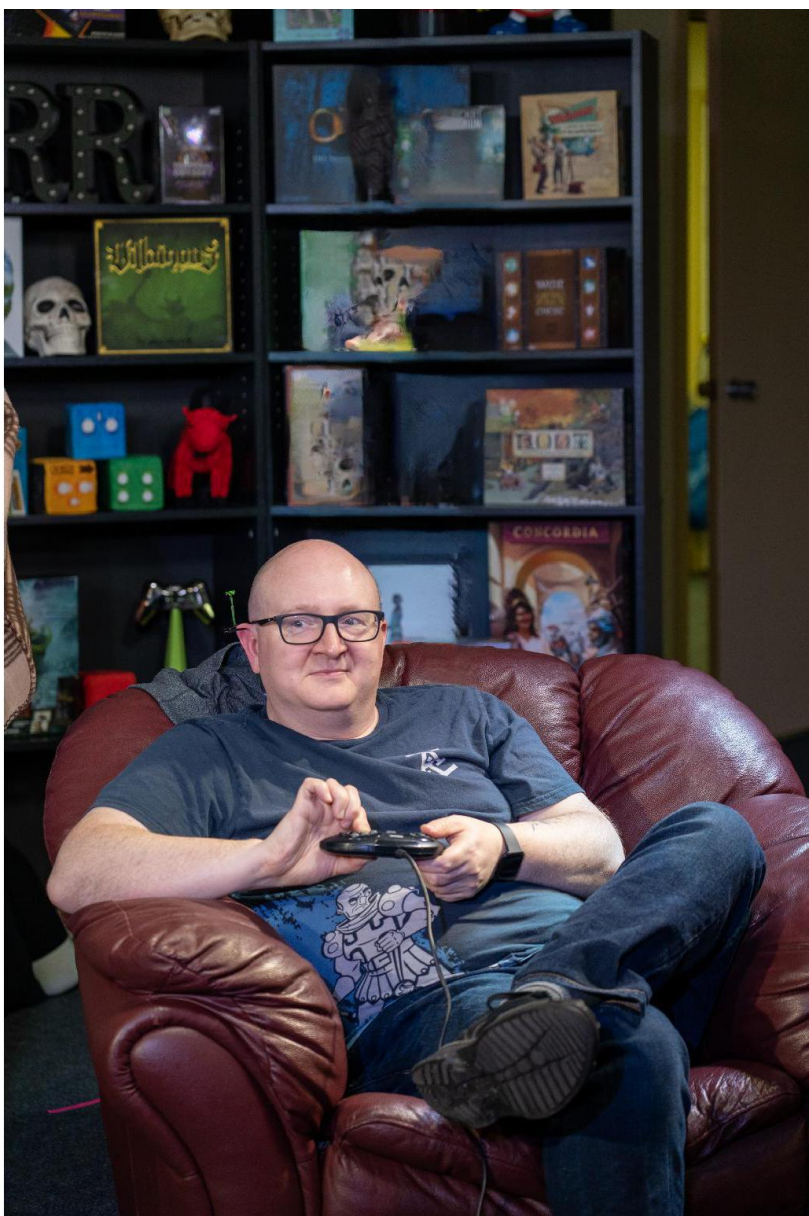



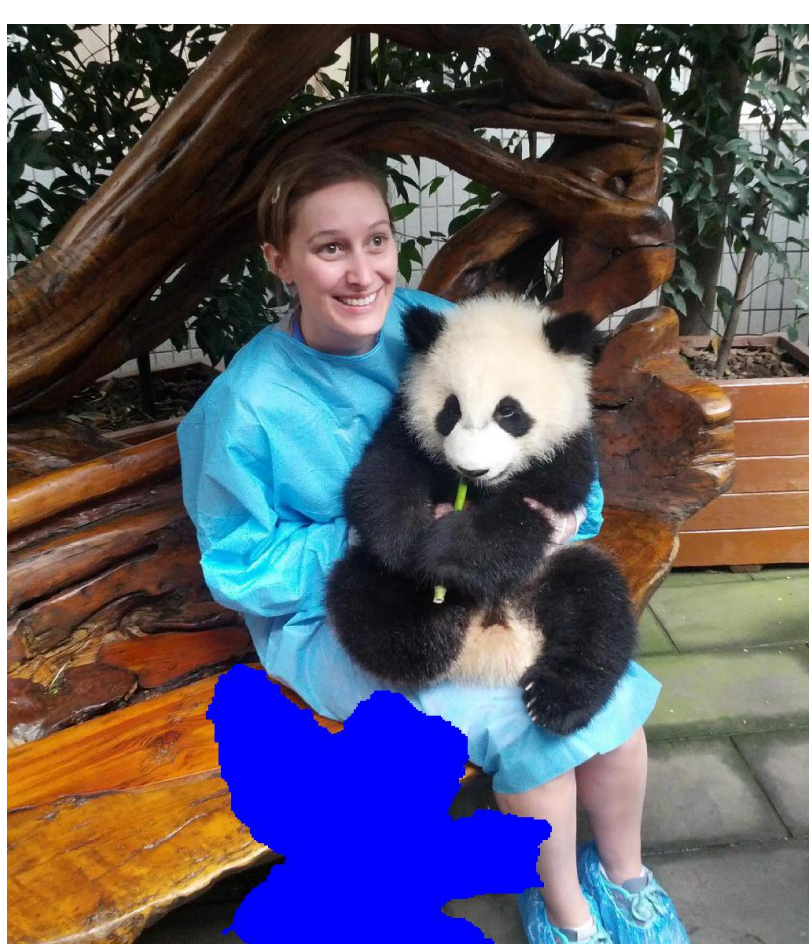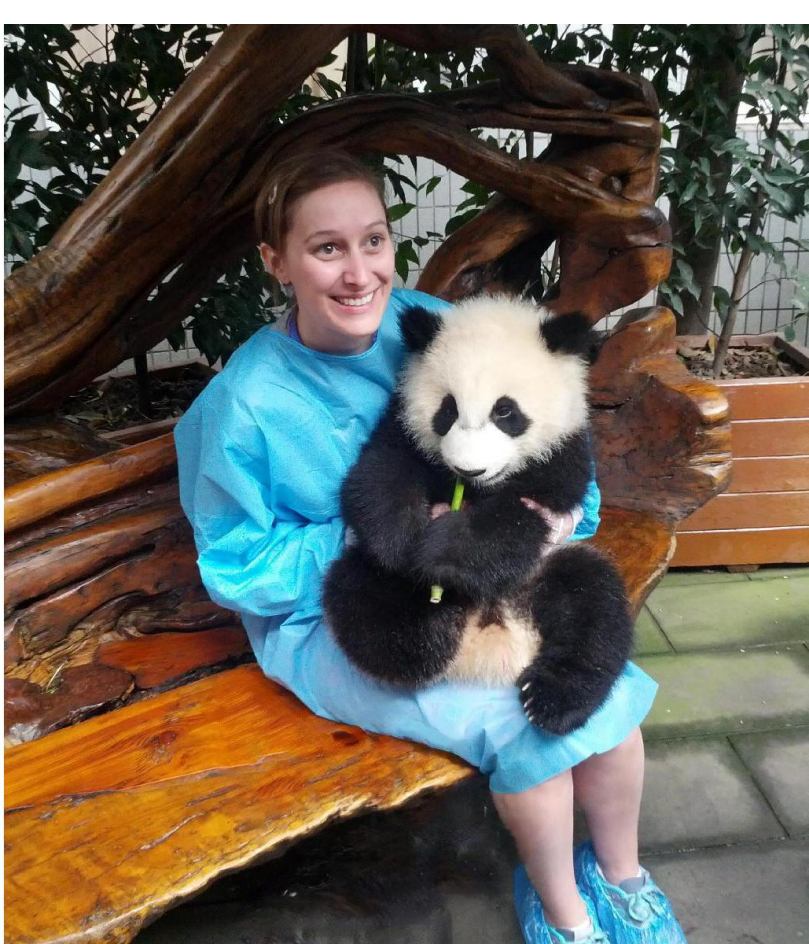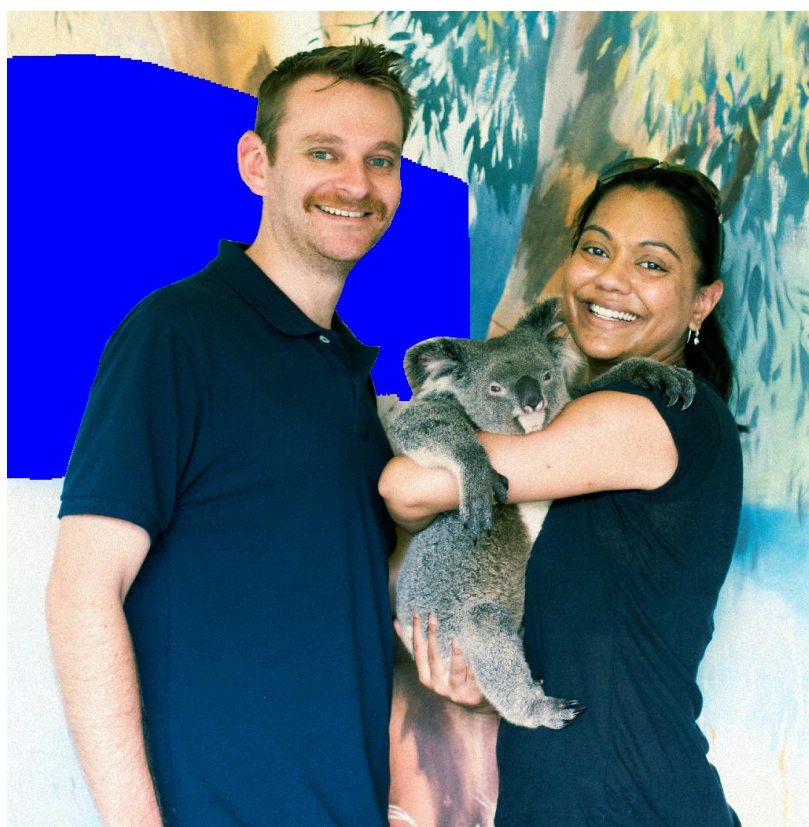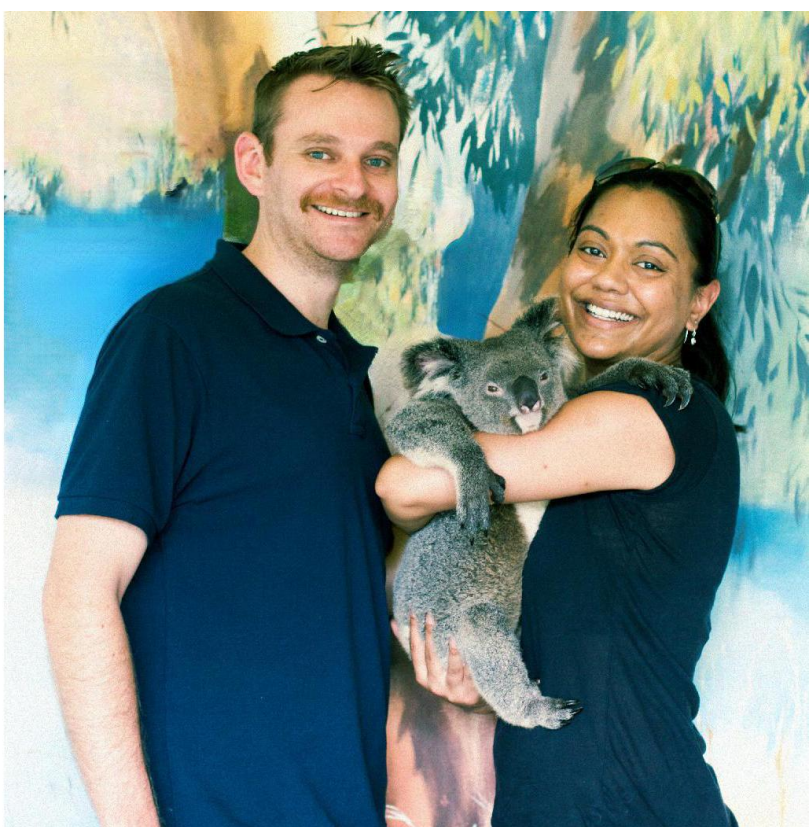



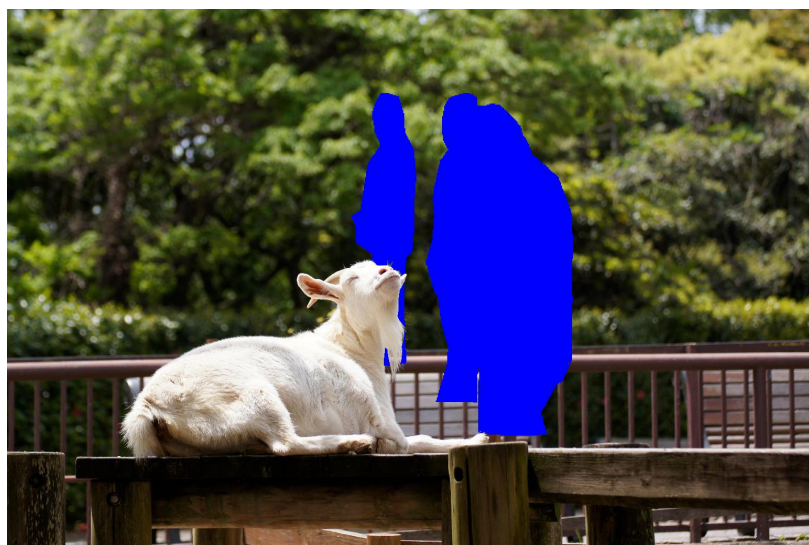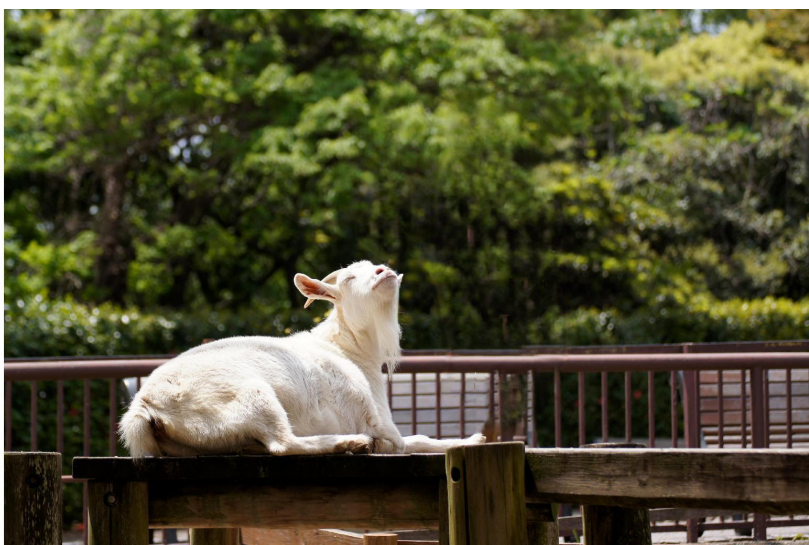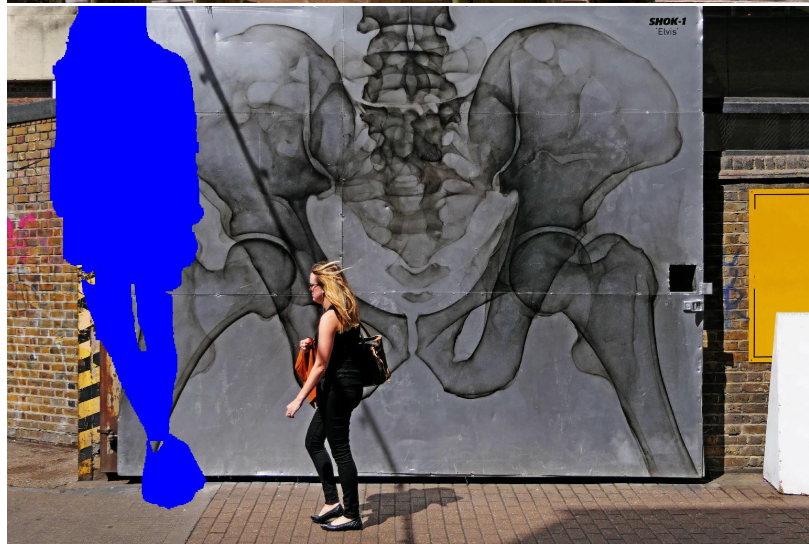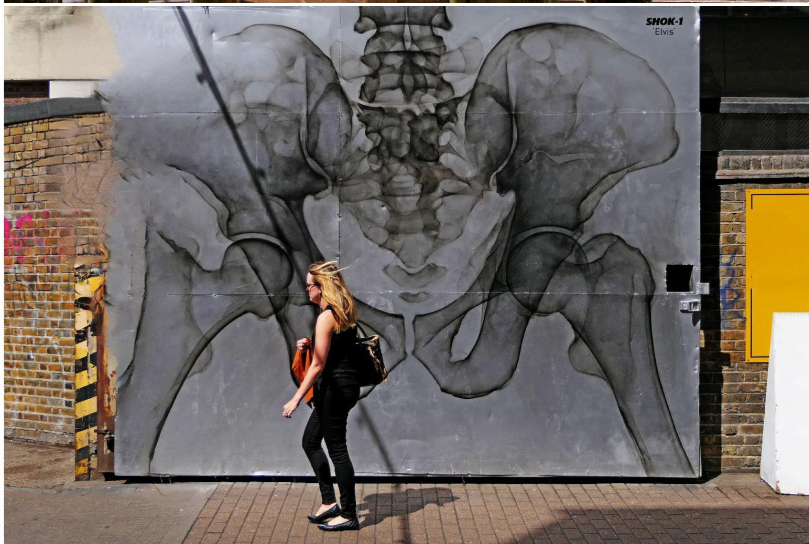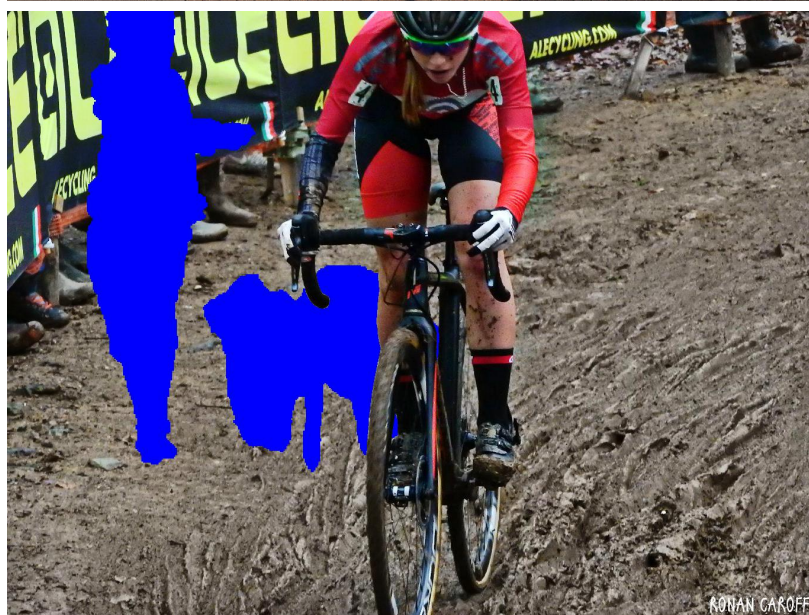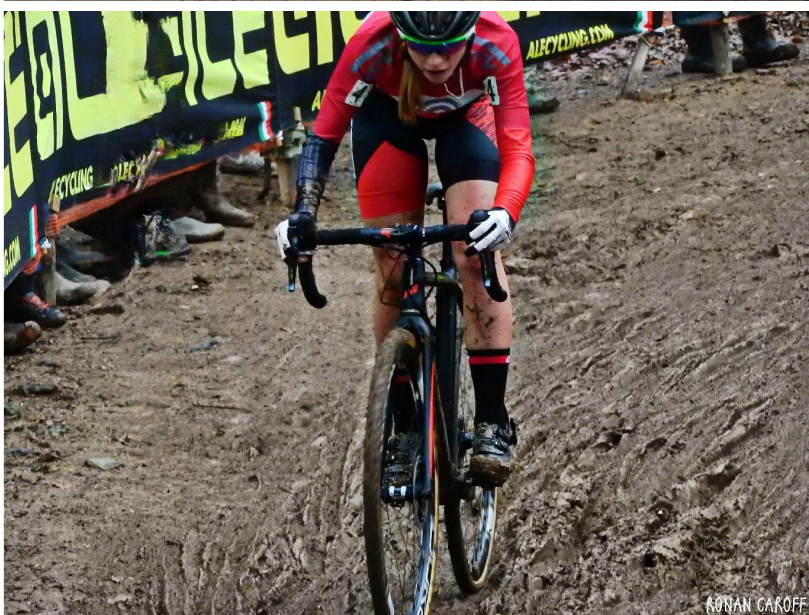



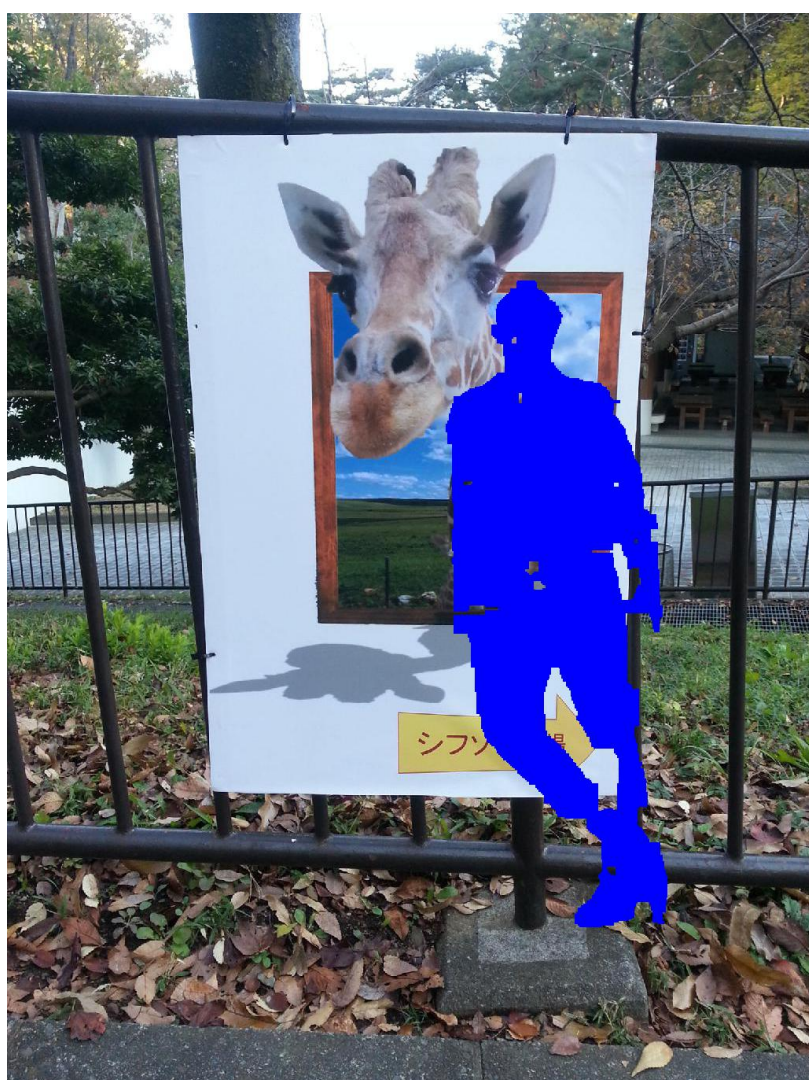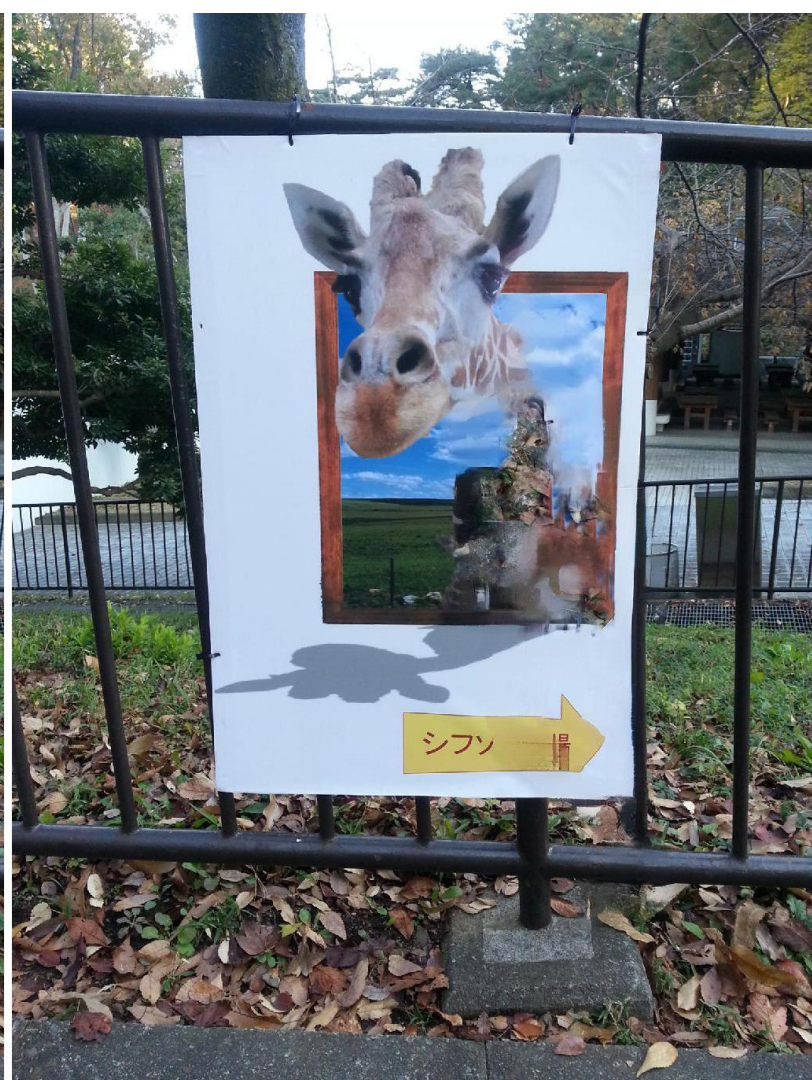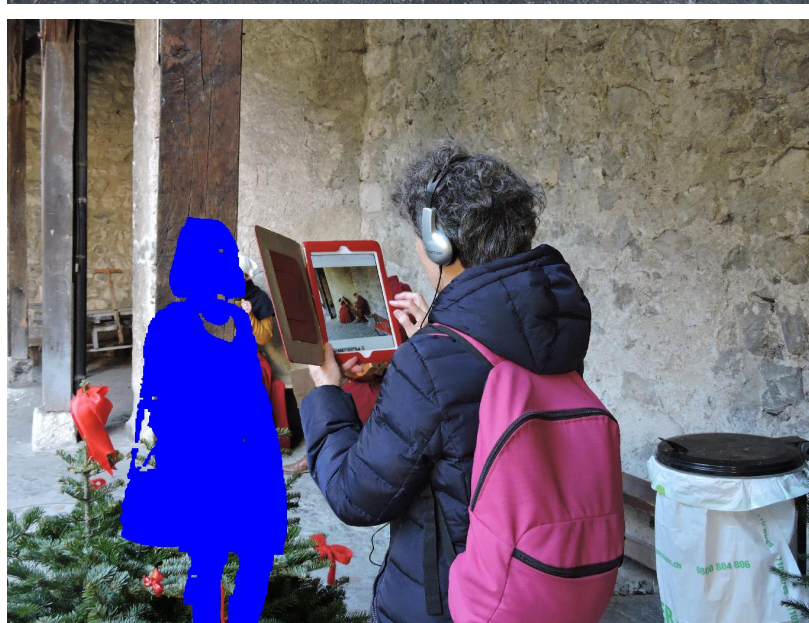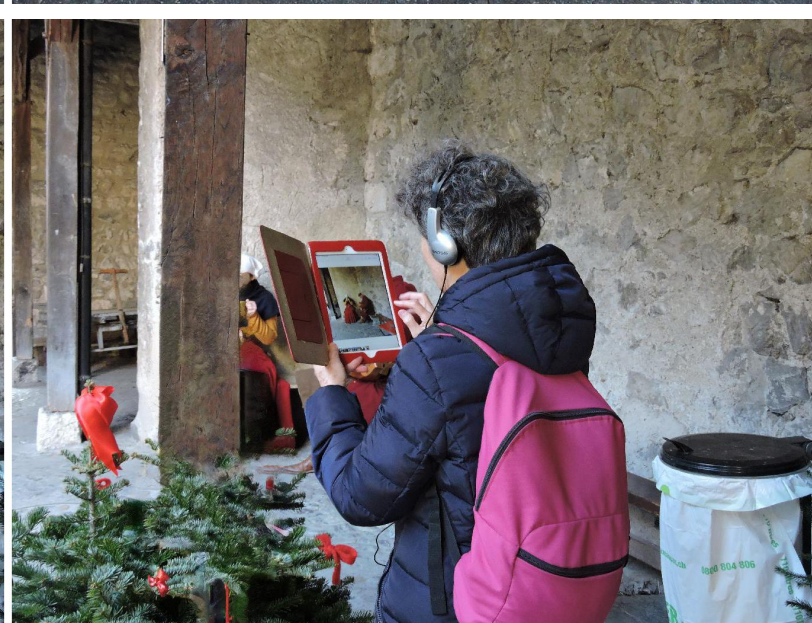



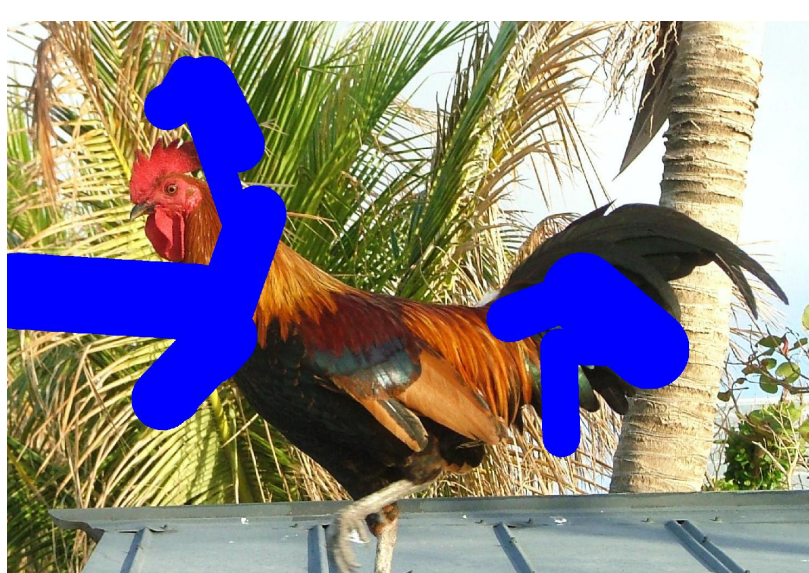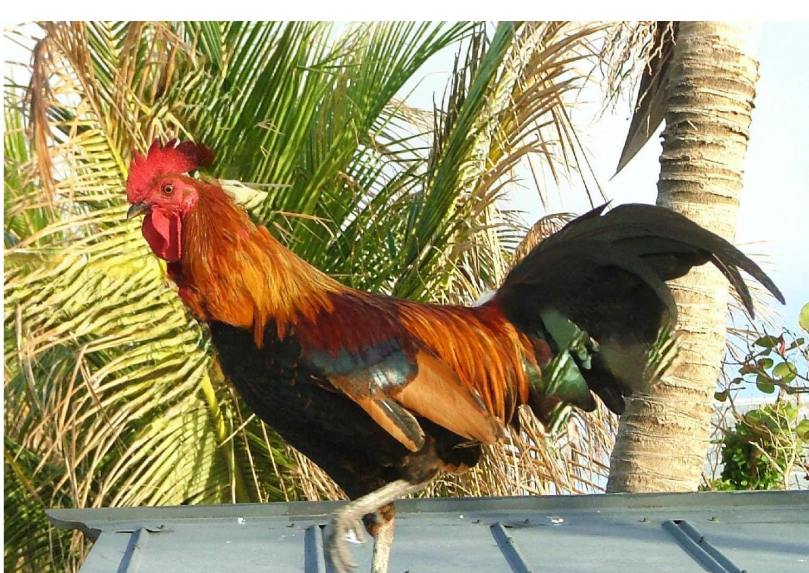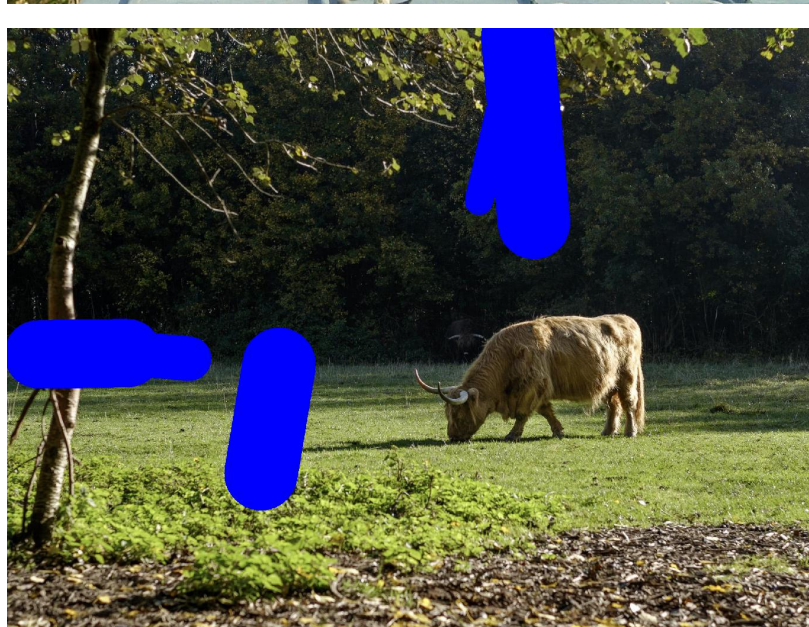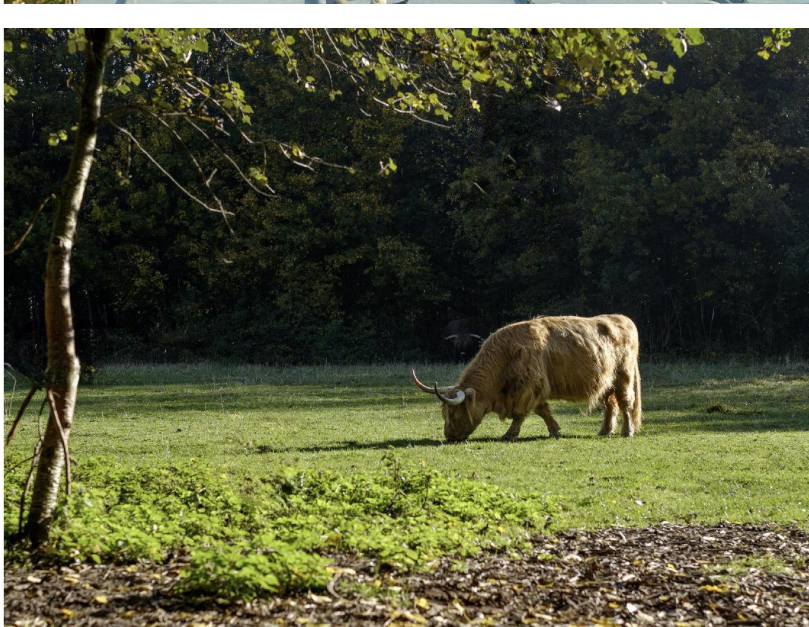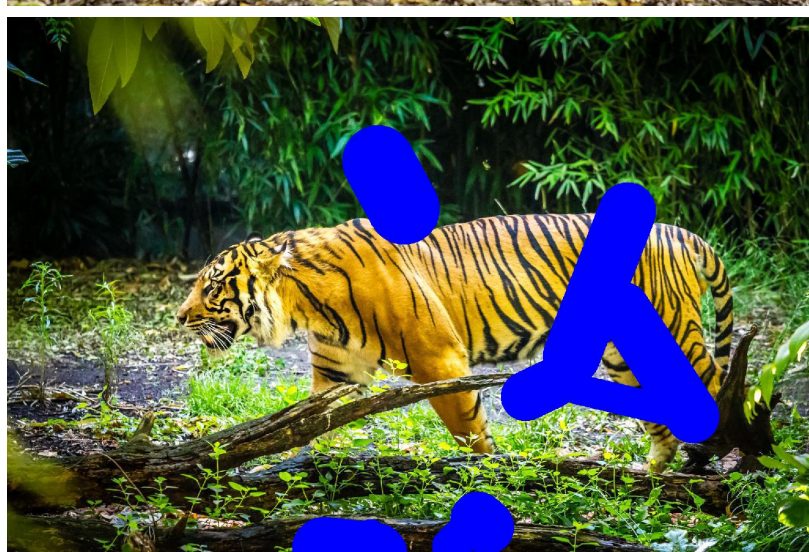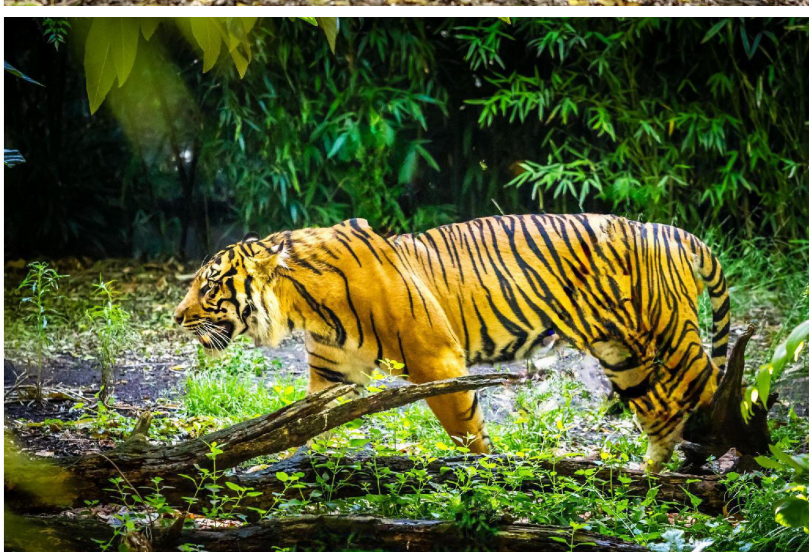



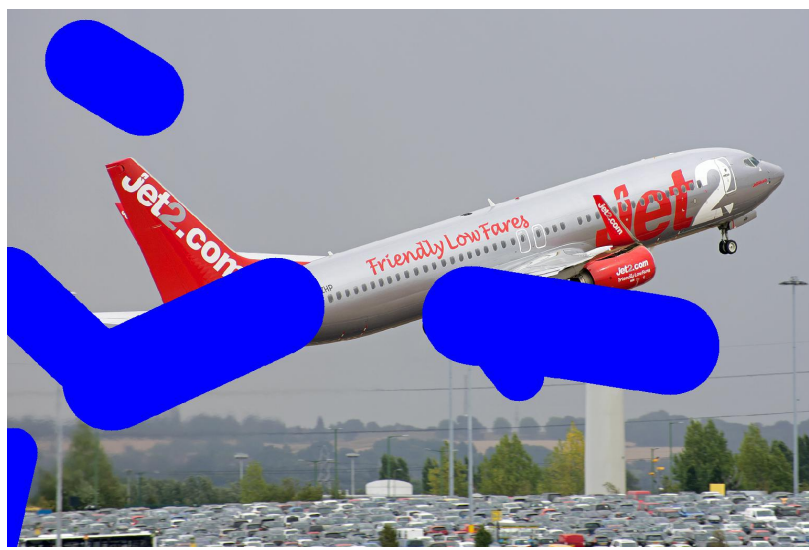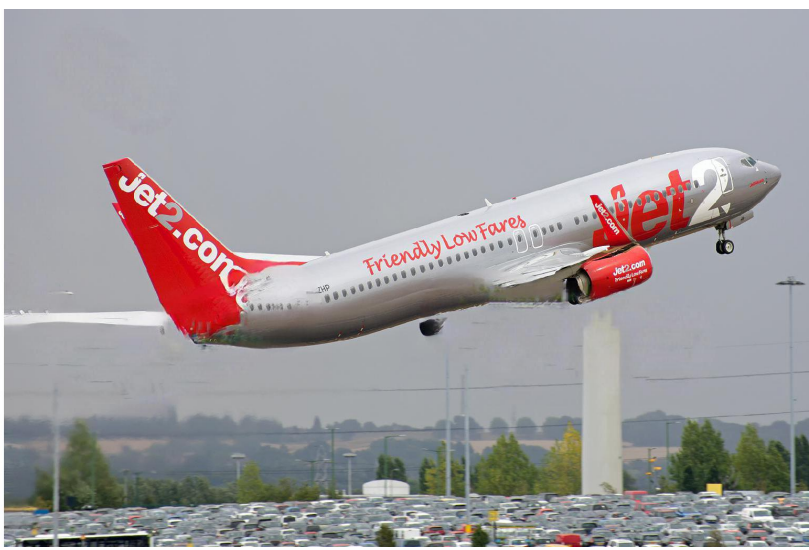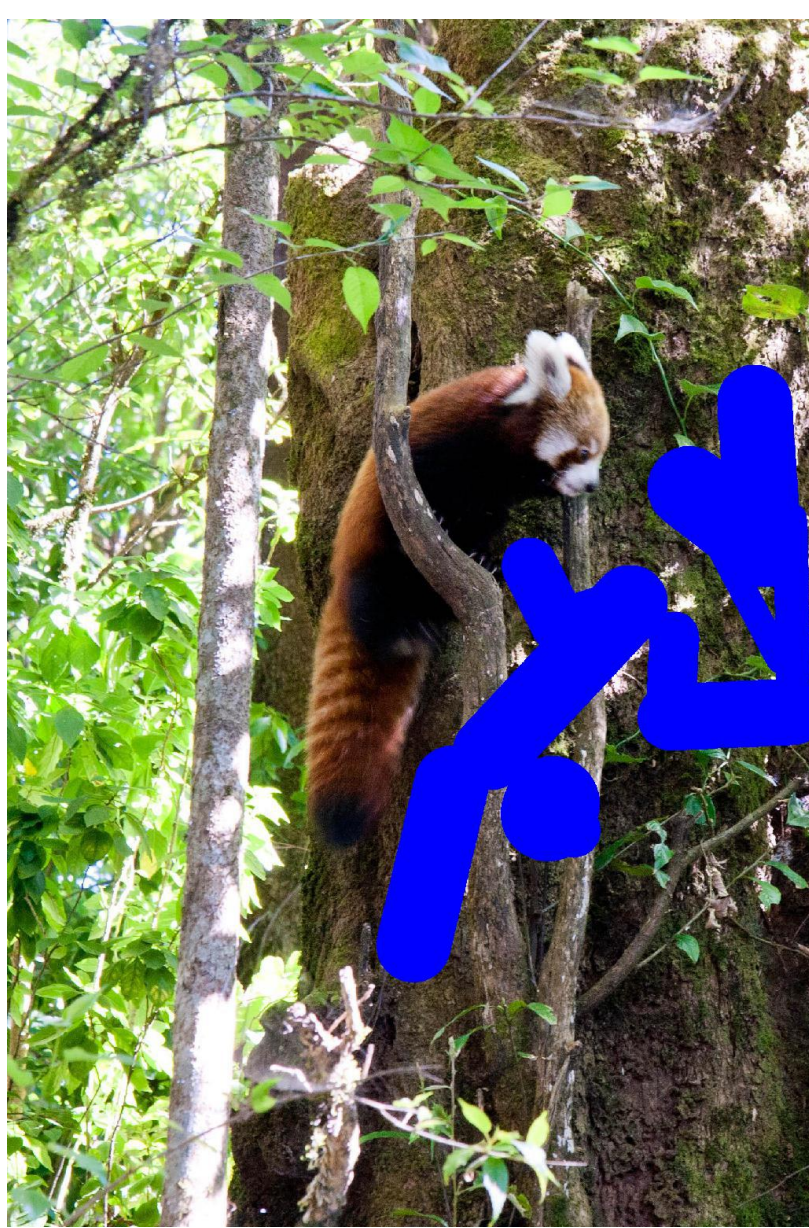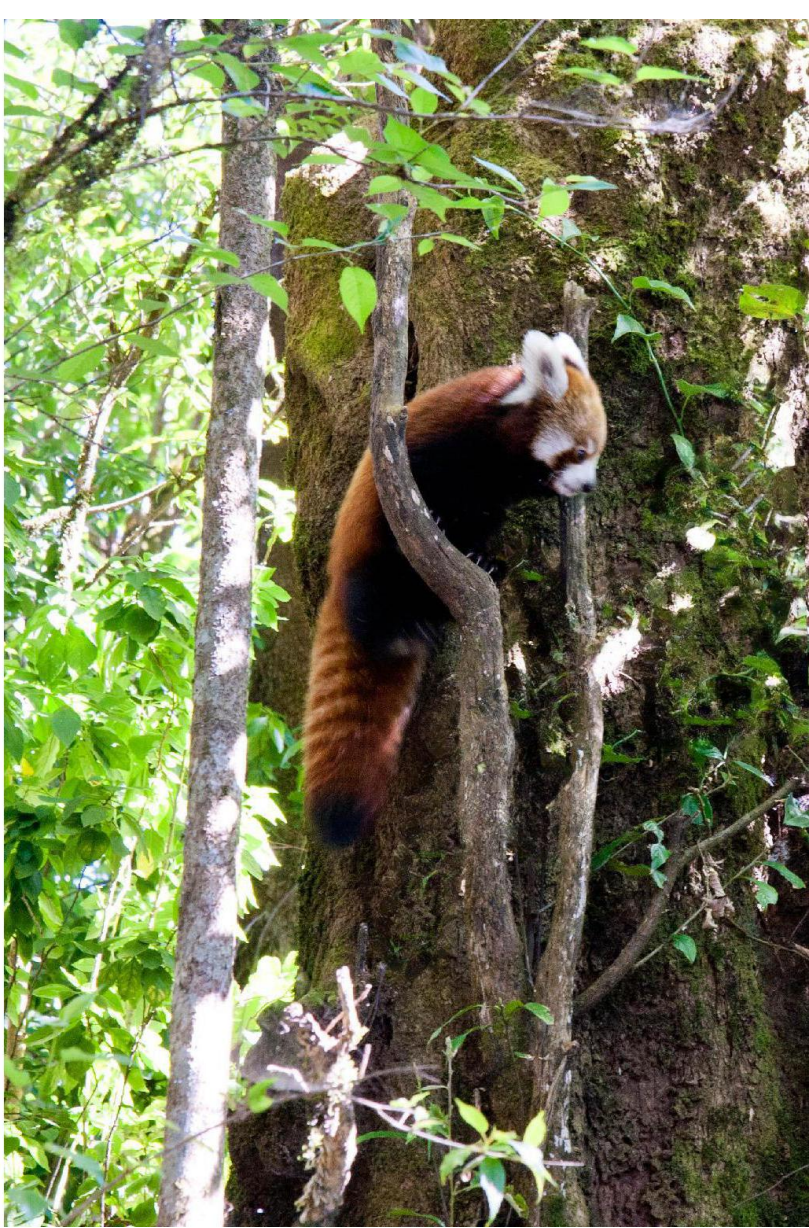



## Removing Real Objects

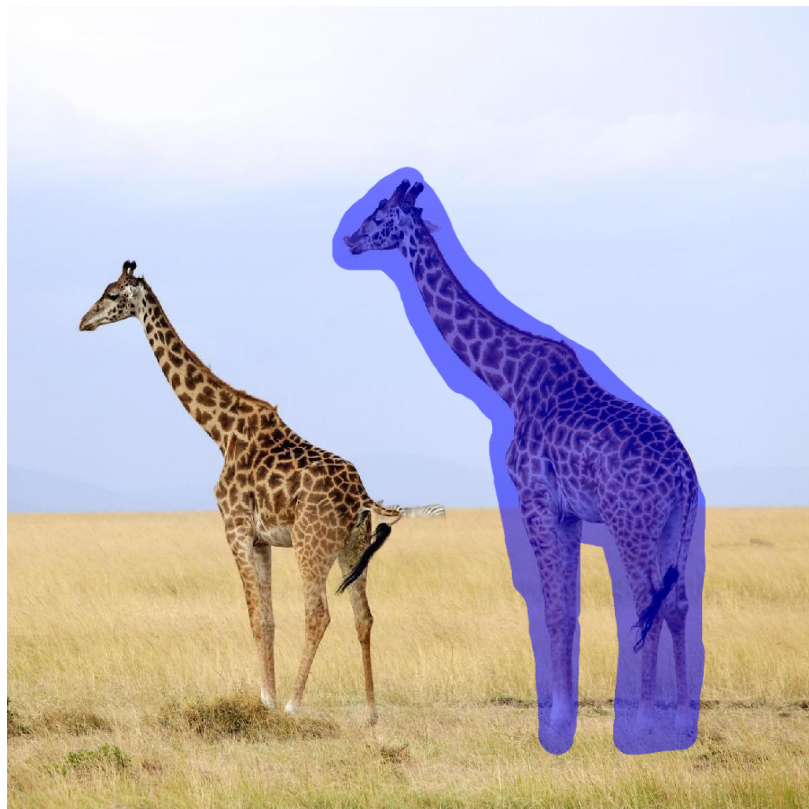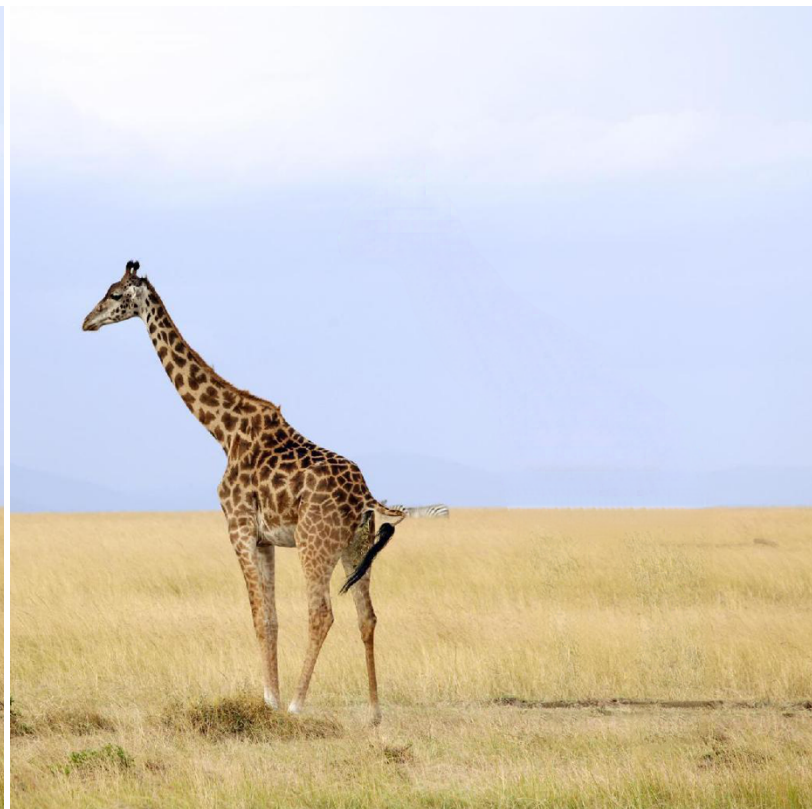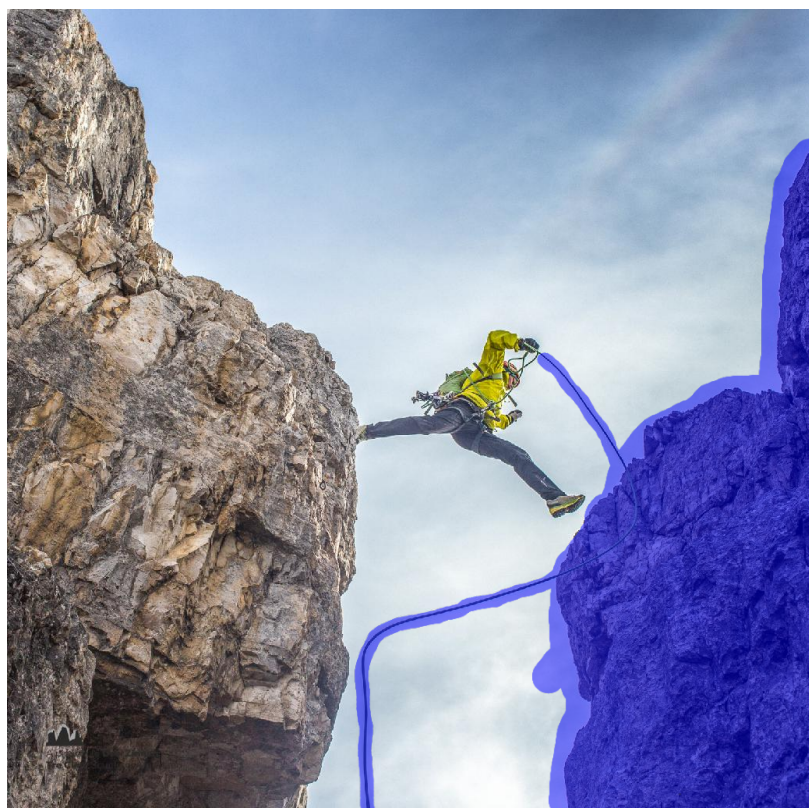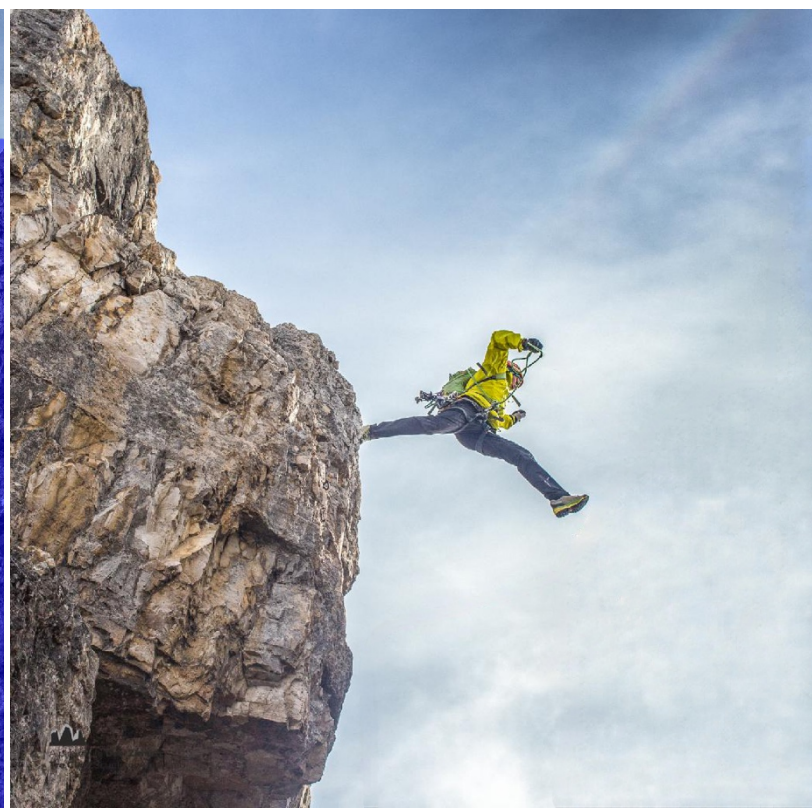



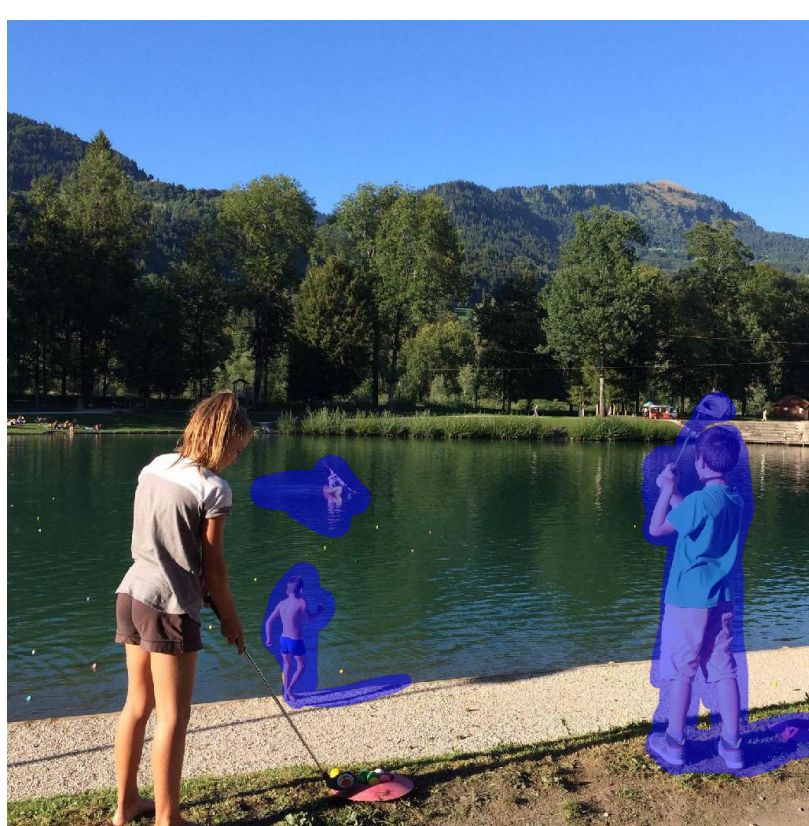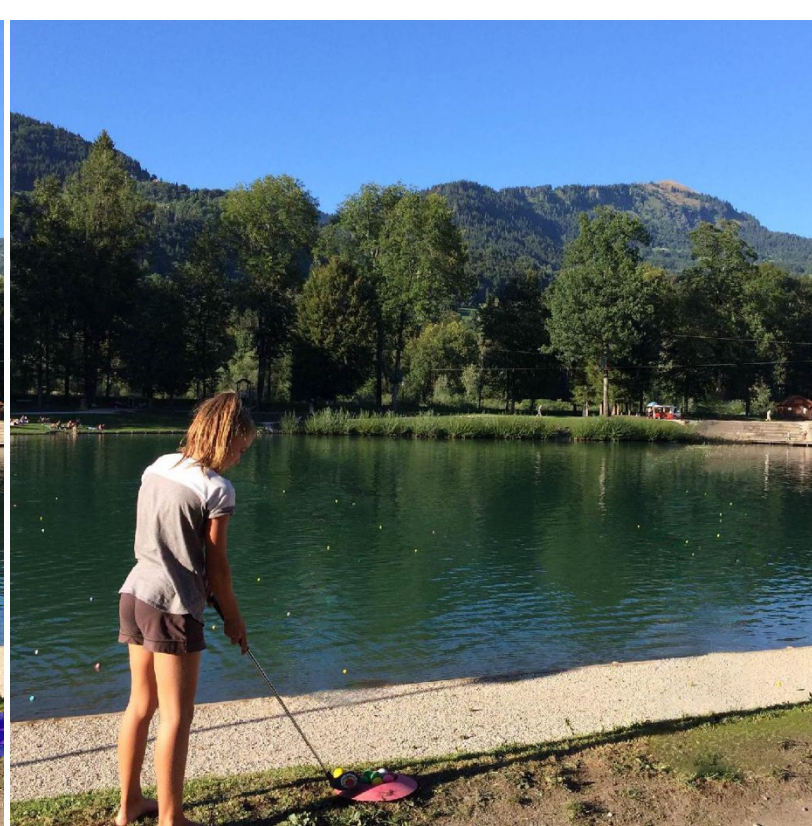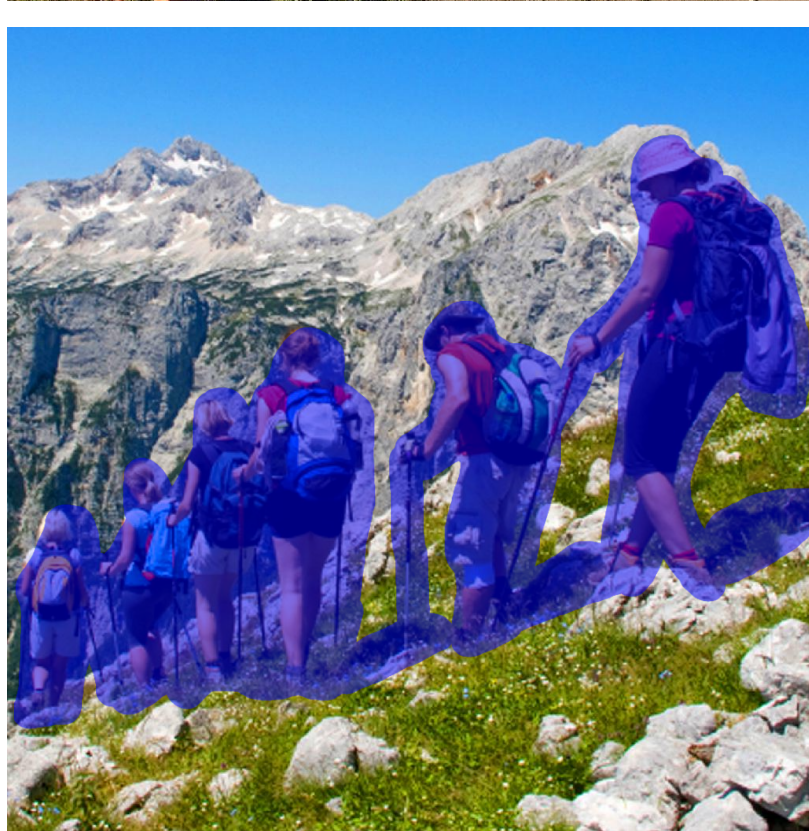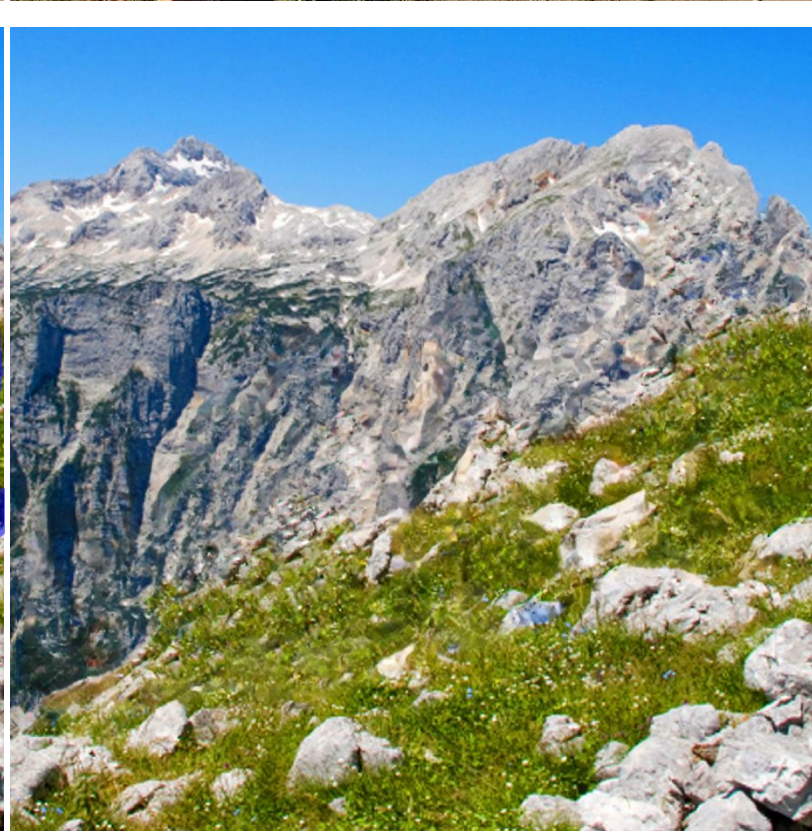



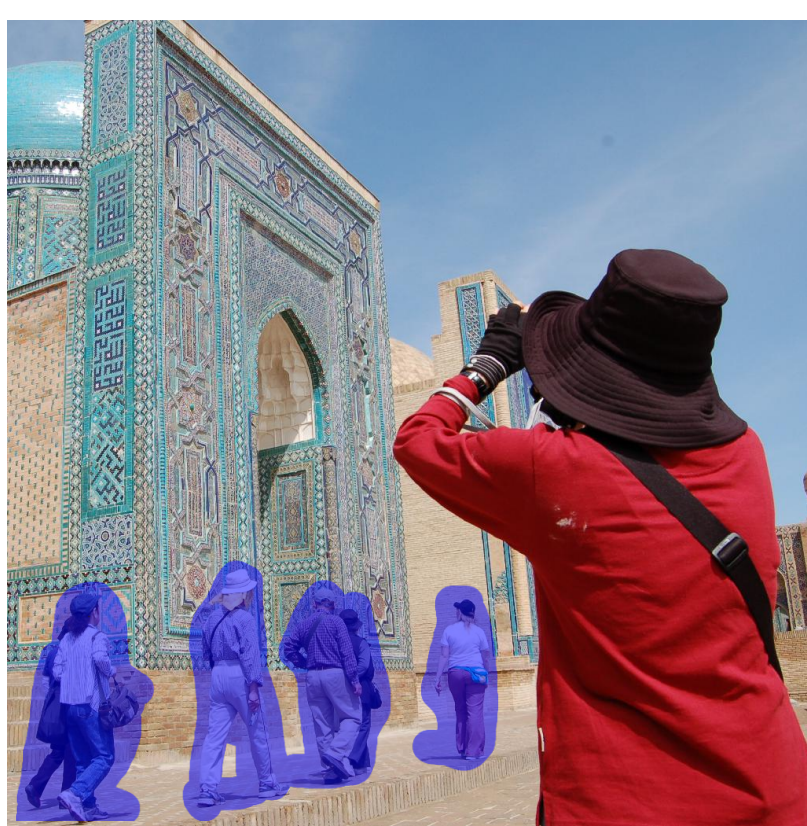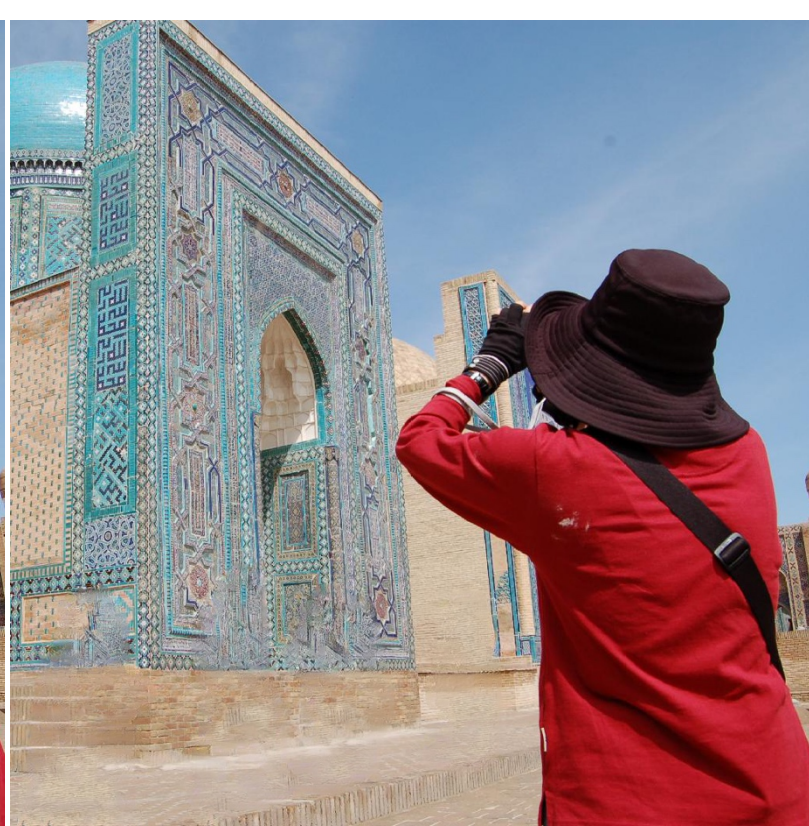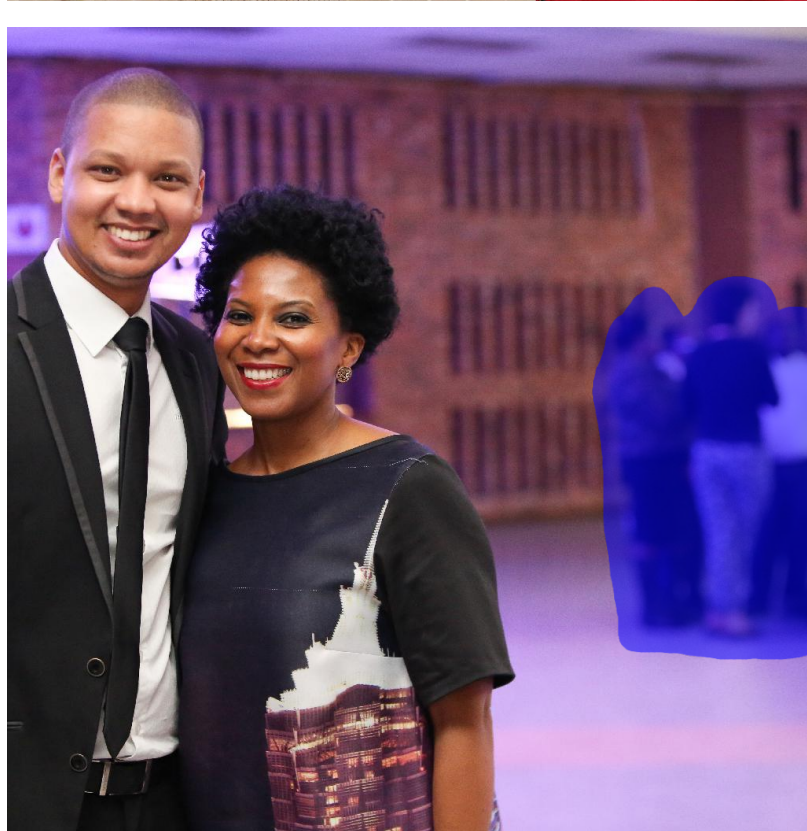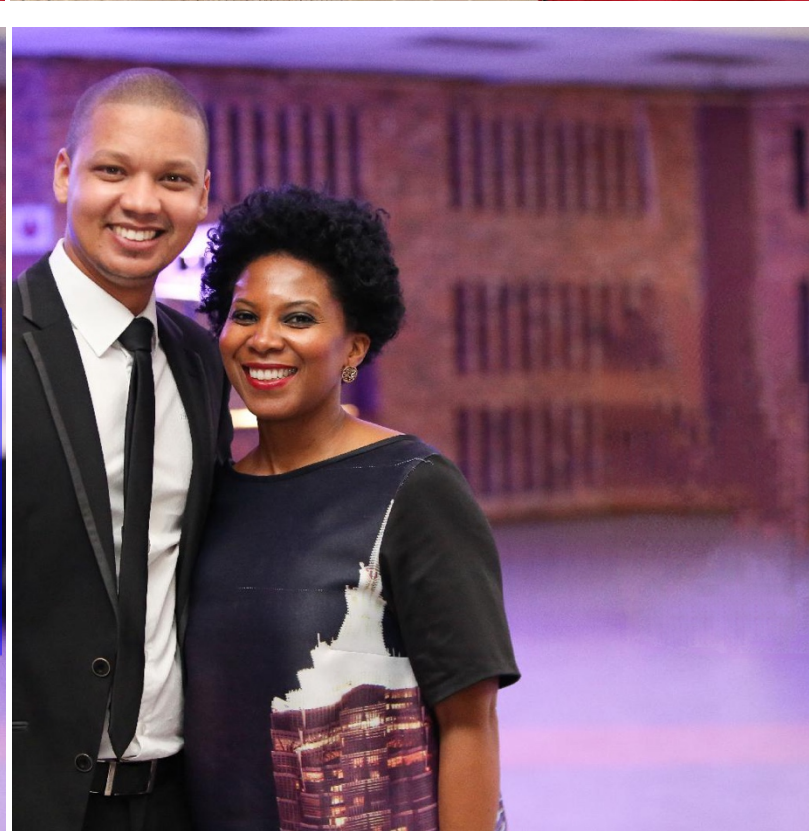

Supplement: Supplementary file 3 [file 123640001-supp.zip]
