# Supplementary material
Source: ML conference proceedings conference paper supplement (https://www.ecva.net/papers/eccv_2020/papers_ECCV/html/123640001_ECCV_2020_paper.php)
Supplement: Supplementary file 7 [file 123640001-supp.zip]

Archive with 9 entries (8 files):
- supp/
- supp/.DS_Store
- __MACOSX/supp/._.DS_Store
- supp/High-resolution-results.pdf
- __MACOSX/supp/._High-resolution-results.pdf
- supp/supplementary-material.pdf
- __MACOSX/supp/._supplementary-material.pdf
- supp/Visual-comparison.pdf
- __MACOSX/supp/._Visual-comparison.pdf
