# Supplementary material
Source: ML conference proceedings conference paper supplement (https://www.ecva.net/papers/eccv_2020/papers_ECCV/html/123640001_ECCV_2020_paper.php)

Visual Comparison on Synthetic Samples (zoom-in to see the details)

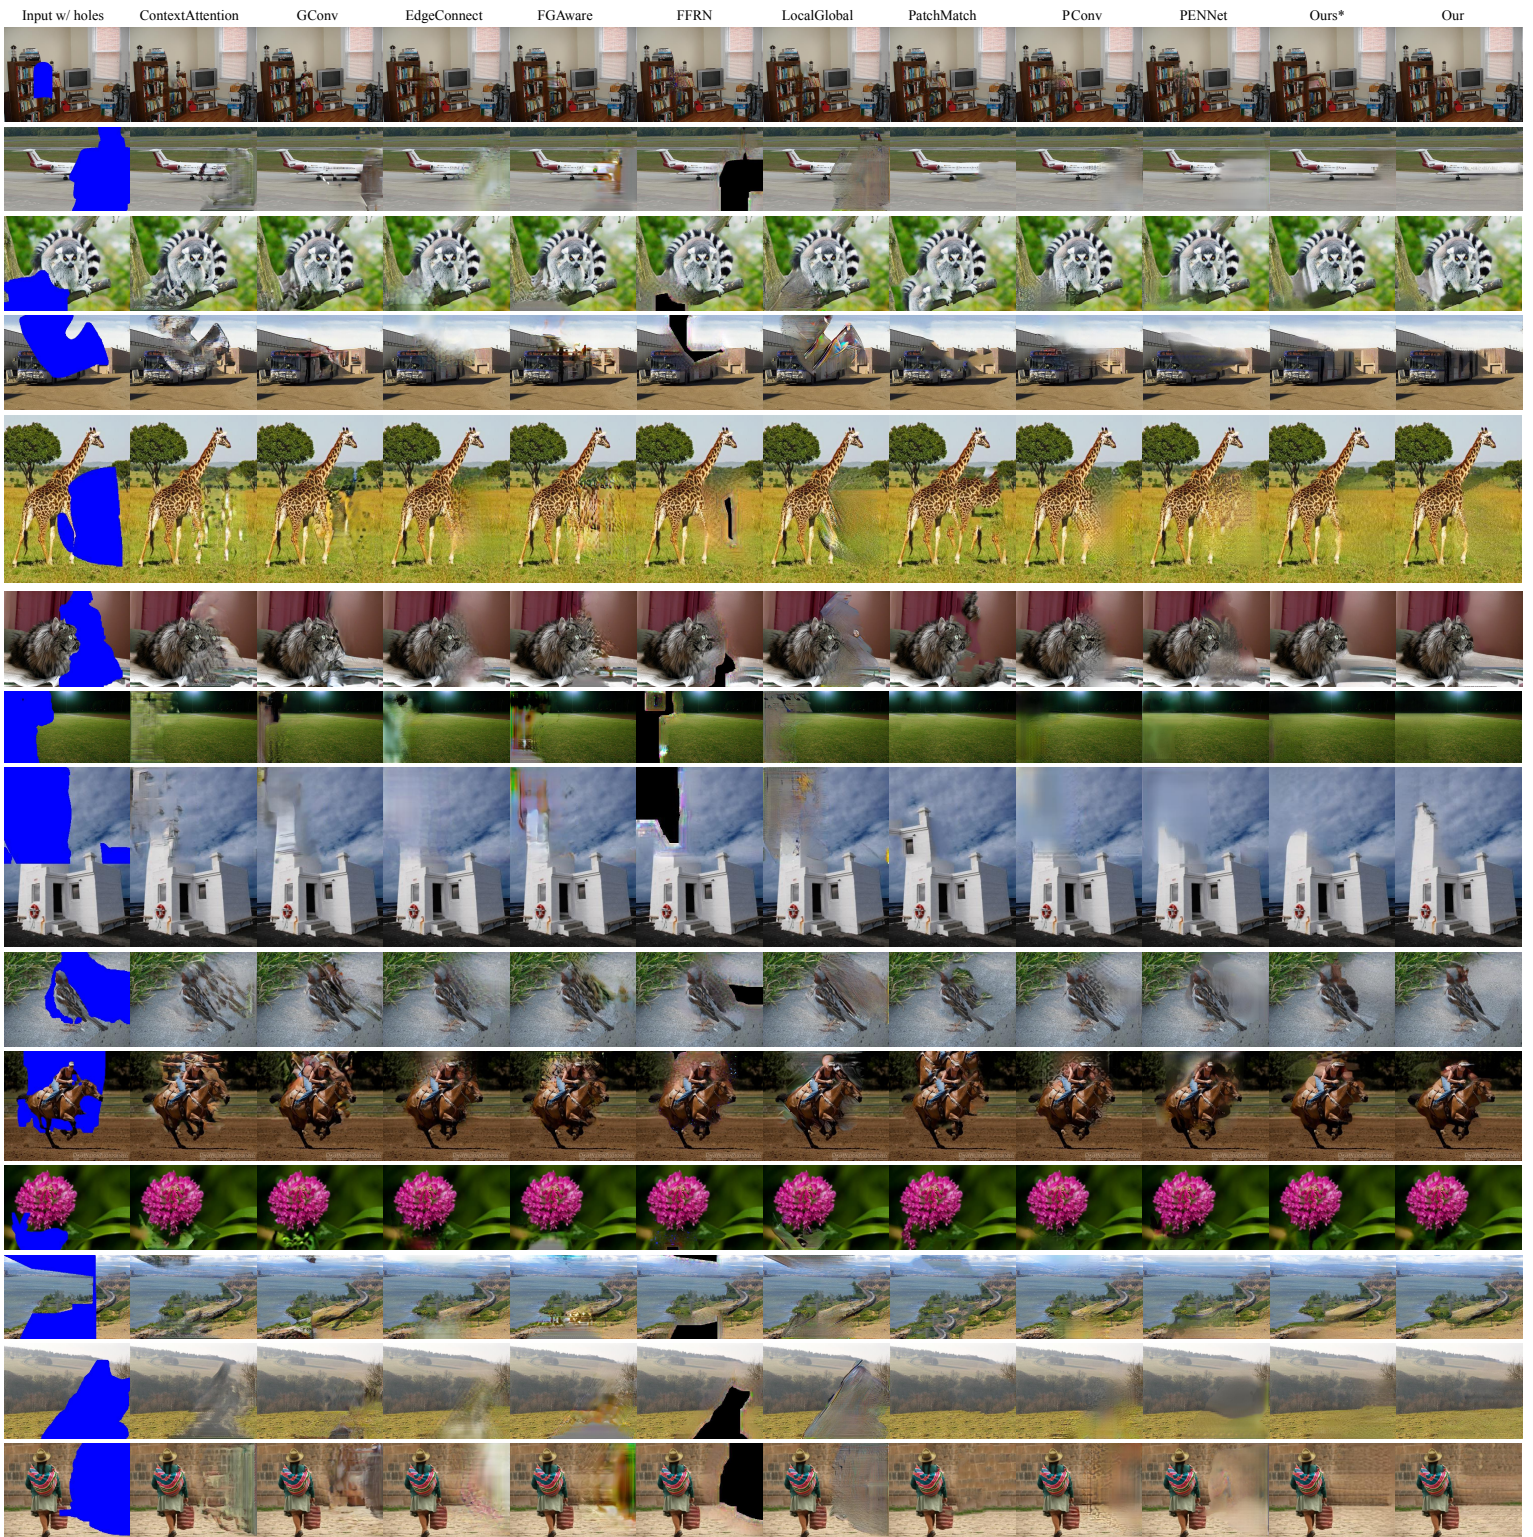

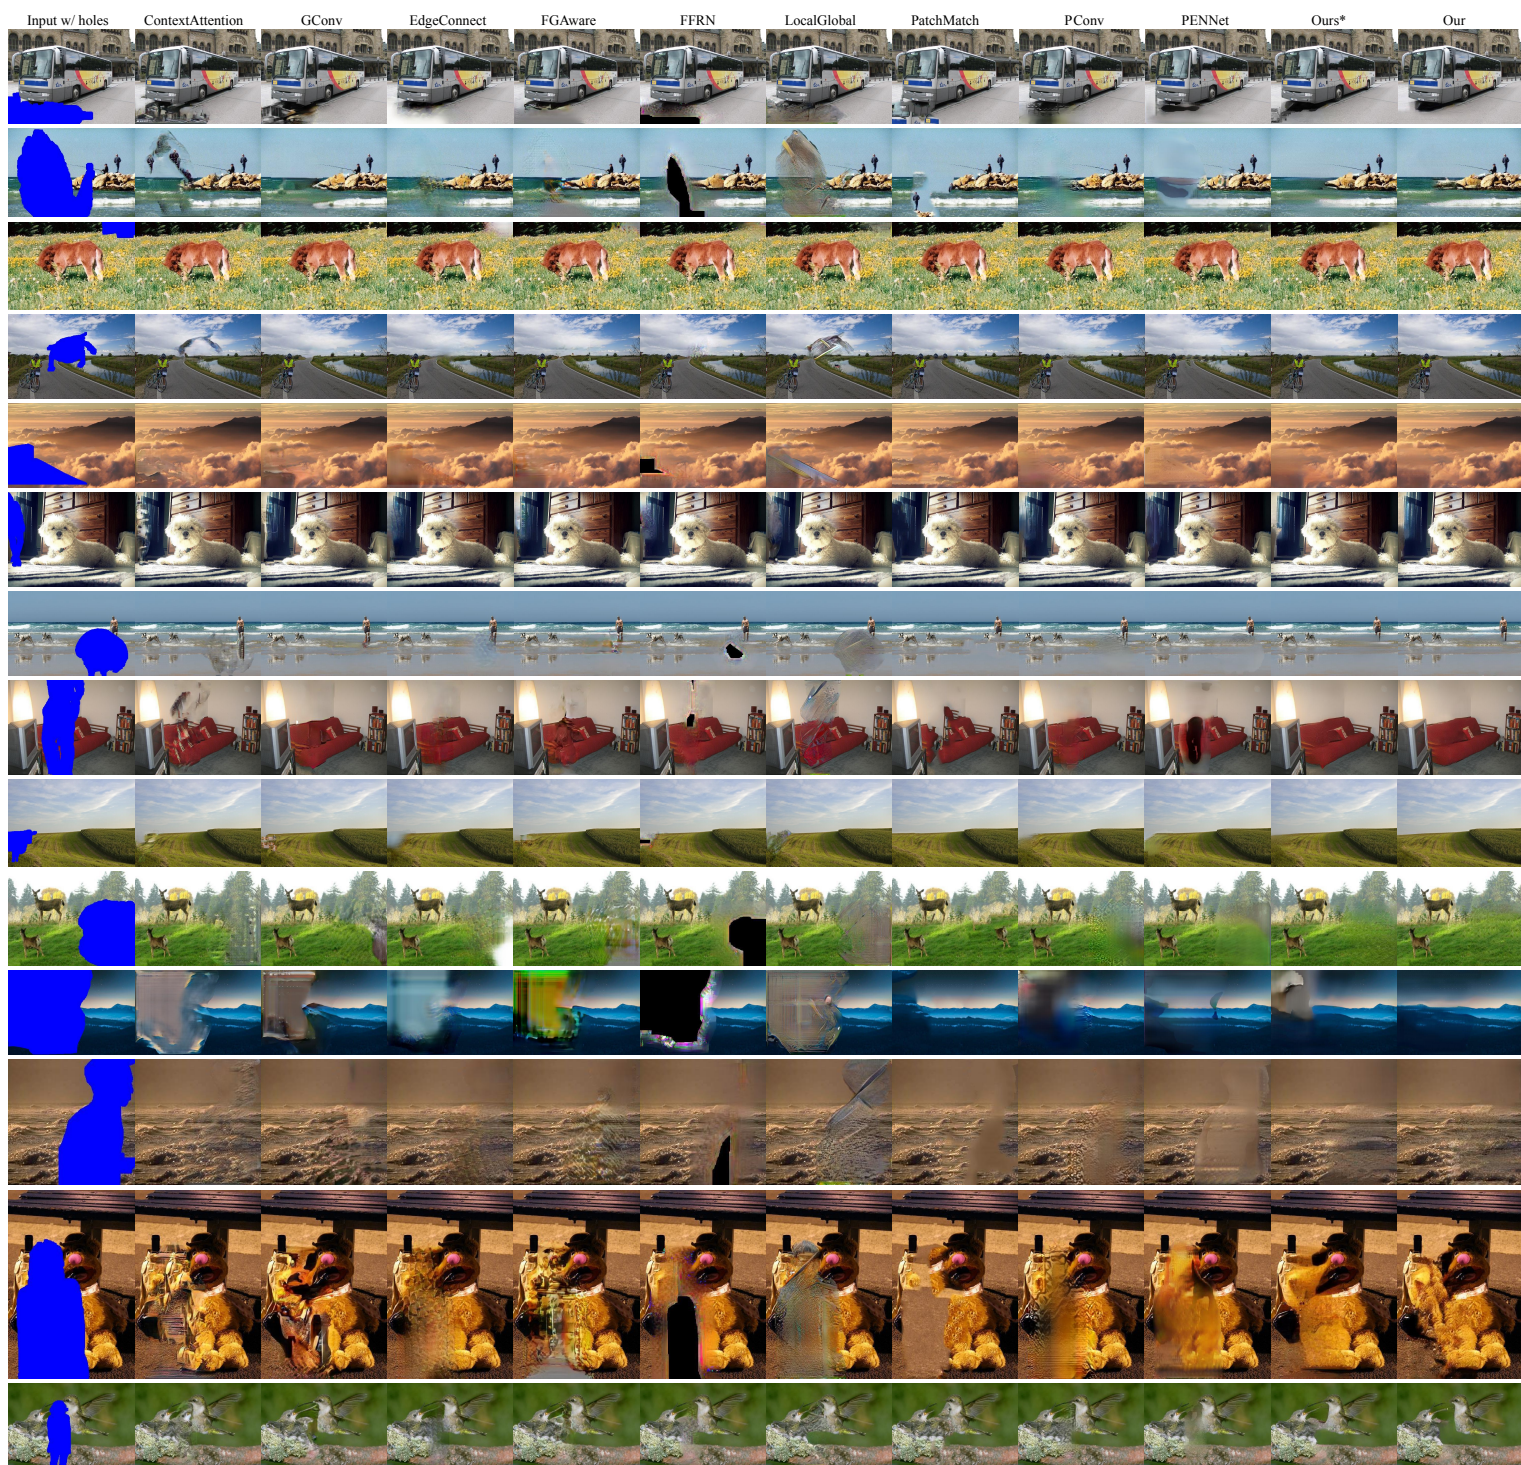





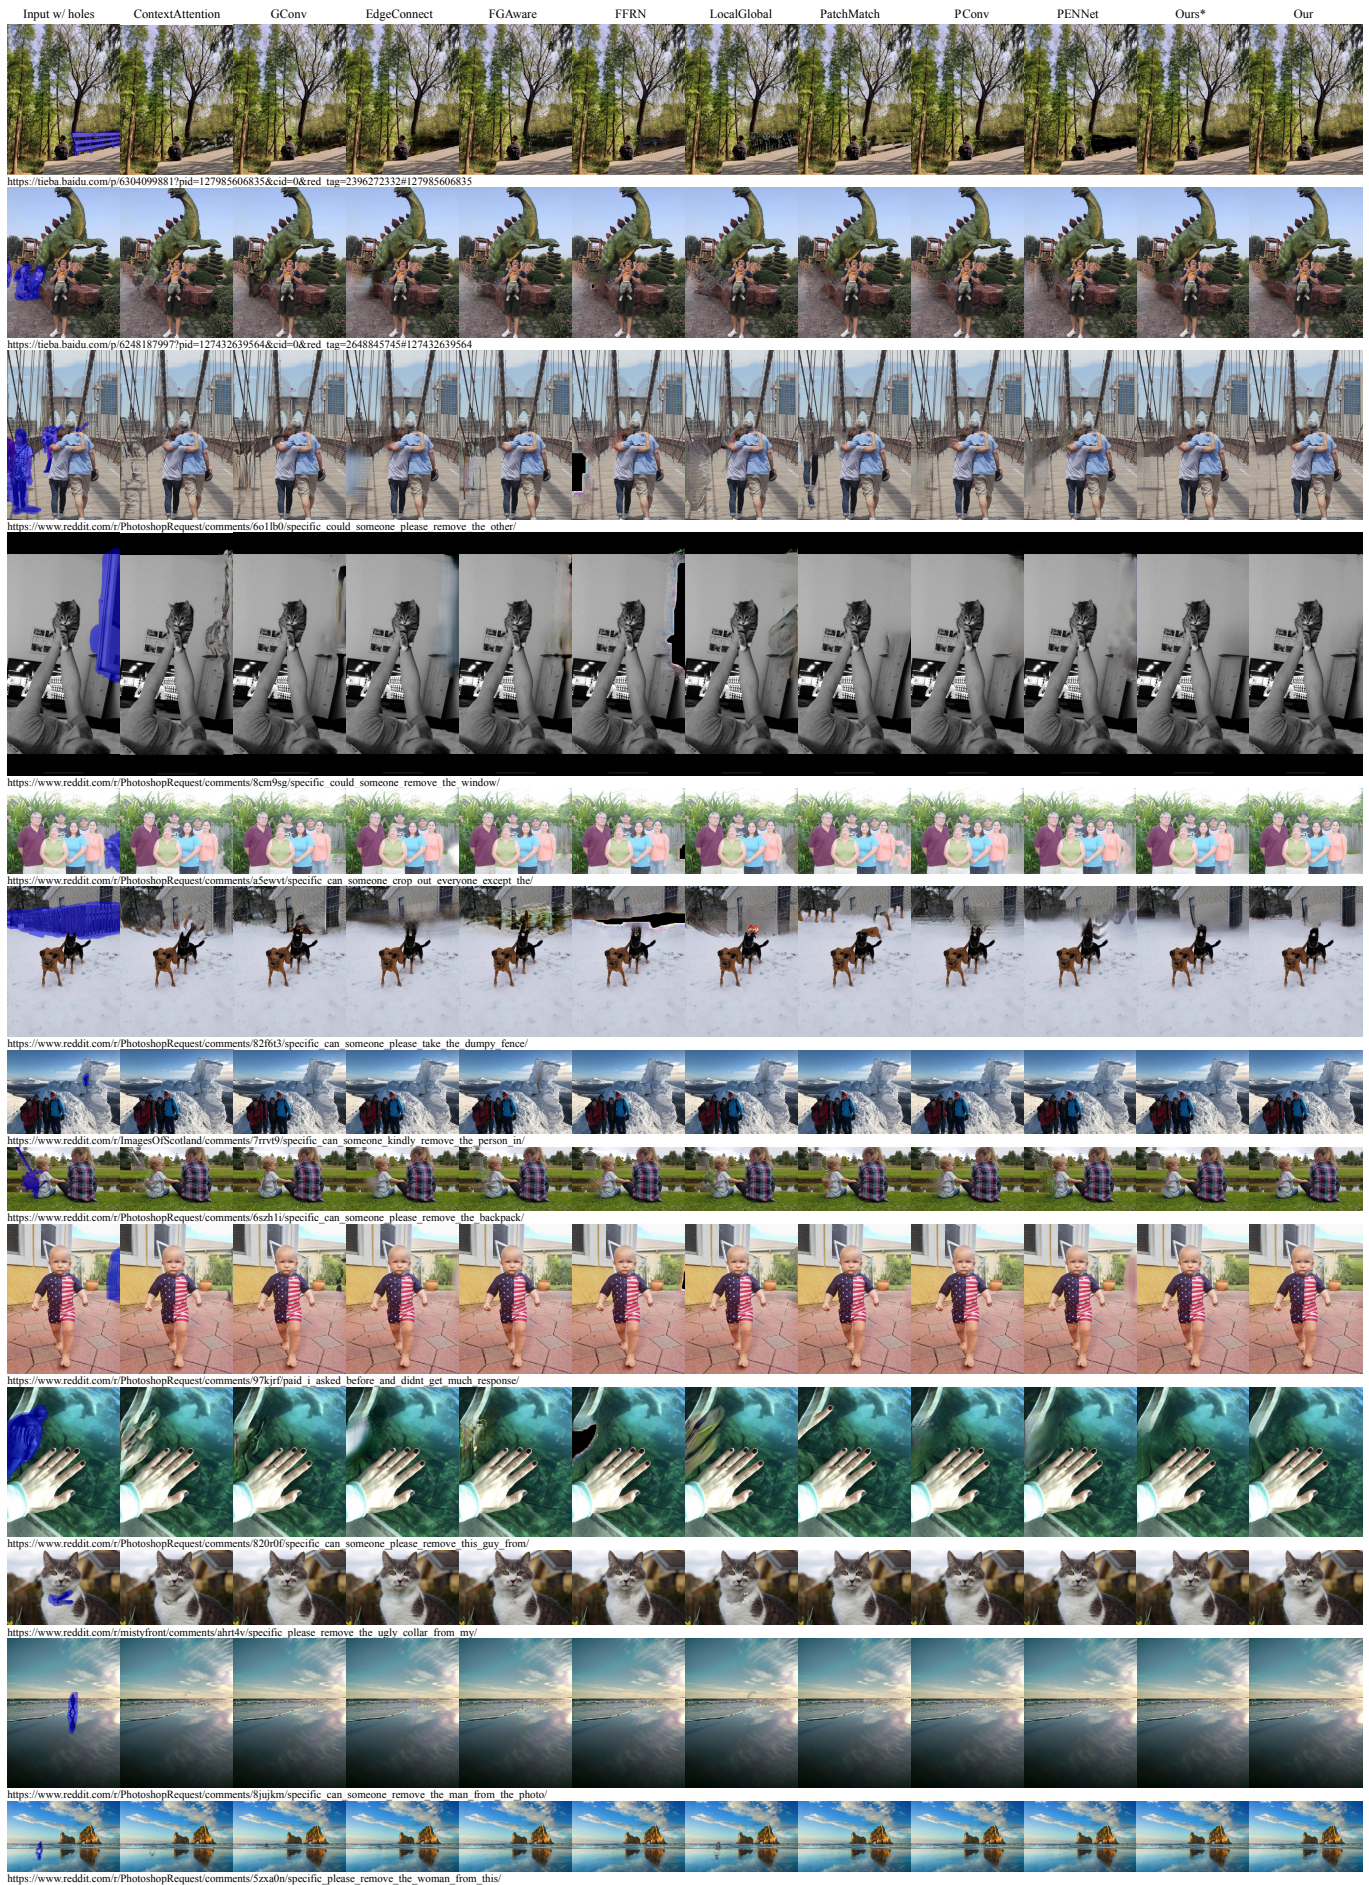

Supplement: Supplementary file 5 [file 123640001-supp.zip]
